# Supplementary material for: The Causal Effect of Dietary Composition on the Risk of Breast Cancer: A Mendelian Randomization Study
Source: Nutrients. 2023 May 31;15(11):2586. doi: 10.3390/nu15112586 (PMC10255061; doi:10.3390/nu15112586)
Supplement: Supplementary file 1 [file nutrients-15-02586-s001.zip › Supplementary Tables.xlsx]

## Sheet: Table S1
Supplementary Table S1. Lead SNPs identified across diet composition GWAS.
Relative intake of fat
SNP*	Psition(chr:BP)	Effect allele	Other allele	EAF	Beta	SE	P value	R2	I2	I2 P value	Sample size	F statistics	Nearest gene
rs1229984	4:100239319	T	C	0.0293	0.0977704	0.00886163	2.64e-28	0.000543747	23.6	0.1986	223867	121.792	ADH1B
rs57193069	7:1862417	A	G	0.5456	-0.015743	0.00279627	1.801e-08	0.00012289	0	0.6047	257928	31.7005	MAD1L1
rs7012814	8:9173358	A	G	0.4727	-0.0188999	0.00278349	1.122e-11	0.00017807	25.4	0.1746	258910	46.112	AC022784.6
rs9927317	16:53820996	C	G	0.6069	-0.0241981	0.00350088	4.767e-12	0.00027939	0	1	171000	47.7885	FTO
rs429358	19:45411941	T	C	0.8483	0.023788	0.00387933	8.651e-10	0.00014564	0	0.5755	258180	37.6066	APOE
rs33988101	19:49218111	T	G	0.5298	-0.0293992	0.00275945	1.664e-26	0.000430621	34.5	0.08658	263591	113.556	MAMSTR
Relative intake of protein
SNP*	Psition(chr:BP)	Effect allele	Other allele	EAF	Beta	SE	P value	R2	I2	I2 P value	Sample size	F statistics	Nearest gene
rs780094	2:27741237	T	C	0.3871	0.017517	0.00282441	5.577e-10	0.0001456	19.2	0.2339	264181	38.4701	GCKR
rs445551	2:79697982	A	G	0.3072	0.0191893	0.00338913	1.493e-08	0.000156739	0	0.8743	204533	32.063	CTNNA2
rs1603978	3:25108236	A	C	0.6935	0.0191684	0.00298526	1.352e-10	0.000156199	0	0.5034	263954	41.2354	AC092422.1
rs13146907	4:39425248	A	G	0.6214	-0.0218977	0.00283943	1.24e-14	0.000225621	0	0.728	263606	59.4879	KLB
rs1461729	8:9187242	A	G	0.0998	0.0318296	0.00459037	4.087e-12	0.000182038	4.5	0.4022	264122	48.0887	AC022784.6
rs55872725	16:53809123	T	C	0.4072	0.0177932	0.00280031	2.092e-10	0.000152846	0	0.6687	264144	40.3792	FTO
rs838133	19:49259529	A	G	0.4469	-0.0318218	0.00301314	4.523e-26	0.000500602	32	0.1724	222801	111.59	FGF21
Relative intake of sugar
SNP*	Psition(chr:BP)	Effect allele	Other allele	EAF	Beta	SE	P value	R2	I2	I2 P value	Sample size	F statistics	Nearest gene
rs12713415	2:60205134	C	G	0.7098	-0.0191068	0.00326556	4.88e-09	0.000150397	0	0.8675	227626	34.239	AC007100.1
rs7619139	3:25110415	A	G	0.59	-0.0242966	0.00299514	4.984e-16	0.000285599	0	0.7969	230409	65.8228	AC092422.1
rs13202107	6:51395463	T	C	0.2165	-0.0201577	0.00357851	1.768e-08	0.000137851	0	0.9506	230181	31.7348	SNORD66
rs7012814	8:9173358	T	C	0.4724	0.0185603	0.00298445	4.994e-10	0.000171718	31.4	0.1244	225230	38.6823	AC022784.6
rs9972653	16:53814363	T	C	0.3987	-0.0202911	0.00300832	1.533e-11	0.000197415	0	0.5946	230454	45.5036	FTO
rs8097672	18:1839601	A	G	0.8544	0.0295339	0.00417676	1.542e-12	0.000217017	0	0.4802	230392	50.0095	AP005230.1
rs341228	18:6395336	A	T	0.3311	0.0186321	0.00313303	2.724e-09	0.000153771	0	0.9604	229996	35.3719	L3MBTL4
rs429358	19:45411941	A	T	0.8488	-0.0276852	0.00416444	2.971e-11	0.000196735	43.6	0.04127	224647	44.2042	APOE
rs838144	19:49250239	T	C	0.5082	-0.0275595	0.0029466	8.527e-21	0.000379662	18.7	0.2443	230412	87.5111	IZUMO1
rs62132802	19:49270872	T	G	0.308	-0.0201727	0.00352669	1.066e-08	0.000173466	27.3	0.2397	188616	32.7237	FGF21
Relative intake of carbohydrate
SNP*	Psition(chr:BP)	Effect allele	Other allele	EAF	Beta	SE	P value	R2	I2	I2 P value	Sample size	F statistics	Nearest gene
rs10206338	2:60209981	A	G	0.578	-0.0157735	0.00278684	1.516e-08	0.000121374	0	0.8089	263941	32.0392	AC007100.1
rs10510554	3:25099776	T	C	0.428	0.0194168	0.00278138	2.939e-12	0.000184597	0	0.9875	264004	48.743	AC133680.1
rs10433500	3:85546798	A	G	0.6371	0.0160764	0.00286311	1.961e-08	0.000119509	14.2	0.2912	263815	31.5318	CADM2
rs7012637	8:9173209	A	G	0.4728	0.0173432	0.00278426	4.684e-10	0.000149948	45.8	0.02725	258760	38.806	AC022784.6
rs9987289	8:9183358	A	G	0.0903	-0.0262326	0.00480012	4.639e-08	0.000113058	4.4	0.4024	264168	29.8694	AC022784.6
rs10962121	9:15702704	T	G	0.4989	-0.0151916	0.0027521	3.395e-08	0.000115392	29.1	0.1323	264060	30.4737	CCDC171
rs2472297	15:75027880	T	C	0.2603	-0.0179506	0.00326196	3.727e-08	0.000124084	0	0.7021	244052	30.2865	CYP1A1
rs7190396	16:53822502	T	G	0.6033	0.0178123	0.00281218	2.393e-10	0.000151868	23.5	0.1876	264173	40.1253	FTO
rs1104608	16:73912588	C	G	0.4231	0.0184667	0.0028931	1.737e-10	0.000166475	0	0.6895	244737	40.7491	AC087565.1
rs36123991	17:44359663	T	G	0.2055	0.0212974	0.0036949	8.238e-09	0.000148112	42.3	0.1232	224315	33.2283	ARL17B
rs8097672	18:1839601	A	T	0.8549	0.0234558	0.003908	1.949e-09	0.000136494	27.2	0.1503	263923	36.0286	AP005230.1
rs429358	19:45411941	T	C	0.8483	-0.0269846	0.00387933	3.493e-12	0.000187412	19.7	0.2338	258180	48.3946	APOE
rs838144	19:49250239	T	C	0.5089	-0.0232282	0.00275313	3.261e-17	0.000269689	44.7	0.02779	263945	71.2016	IZUMO1
Note:EAF = effect allele frequency; Beta = semi-standardized beta (i.e., increase in phenotypic standard deviations per effect allele); SE = semi-standardized standard error; R2 = explained incremental variance in the phenotype. I2 = Higgin's heterogeneity statistic. *: Based on genomic build GRCh37.

## Sheet: Table S2 
Supplementary Table S2. The power of Mendelian randomization analysis in the study.
Outcome	Exposure	Sample size		Proportion of cases	R2(%)	OR (based on IVW)	Alpha	Power
		Cases	Controls
Breast cancer overall	Relative intake of carbohydrates	133384	113789	0.54	0.096	1.36	0.05	0.65
	Relative intake of fat	133384	113789	0.54	0.128	0.91	0.05	0.13
	Relative intake of protein	133384	113789	0.54	0.064	0.64	0.05	0.82
	Relative intake of sugar	133384	113789	0.54	0.046	1.36	0.05	0.37
Luminal A subtype	Relative intake of carbohydrates	7325	20815	0.260306	0.084	1.61	0.05	0.21
	Relative intake of fat	7325	20815	0.260306	0.128	0.86	0.05	0.07
	Relative intake of protein	7325	20815	0.260306	0.064	0.5	0.05	0.2
	Relative intake of sugar	7325	20815	0.260306	0.046	1.28	0.05	0.07
Luminal B subtype	Relative intake of carbohydrates	1682	20815	0.0747655	0.108	2.07	0.05	0.25
	Relative intake of fat	1682	20815	0.0747655	0.128	1.17	0.05	0.06
	Relative intake of protein	1682	20815	0.0747655	0.114	0.48	0.05	0.11
	Relative intake of sugar	1682	20815	0.0747655	0.087	8.72	0.05	NA
Lumibal B Her2 negative	Relative intake of carbohydrates	1779	20815	0.0787377	0.153	0.95	0.05	0.05
	Relative intake of fat	1779	20815	0.0787377	0.128	0.74	0.05	0.07
	Relative intake of protein	1779	20815	0.0787377	0.114	1	0.05	0.05
	Relative intake of sugar	1779	20815	0.0787377	0.104	2.41	0.05	0.43
Her2 positive	Relative intake of carbohydrates	718	20815	0.0333442	0.157	1.1	0.05	0.05
	Relative intake of fat	718	20815	0.0333442	0.128	0.51	0.05	0.07
	Relative intake of protein	718	20815	0.0333442	0.136	0.31	0.05	0.1
	Relative intake of sugar	718	20815	0.0333442	0.104	4.4	0.05	0.83
Triple negative	Relative intake of carbohydrates	2006	20815	0.0879015	0.153	0.83	0.05	0.06
	Relative intake of fat	2006	20815	0.0879015	0.128	1.5	0.05	0.12
	Relative intake of protein	2006	20815	0.0879015	0.072	0.94	0.05	0.05
	Relative intake of sugar	2006	20815	0.0879015	0.046	1.04	0.05	0.05
ER positive	Relative intake of carbohydrates	69501	105974	0.396074	0.155	1.04	0.05	0.06
	Relative intake of fat	69501	105974	0.396074	0.128	0.89	0.05	0.14
	Relative intake of protein	69501	105974	0.396074	0.064	0.49	0.05	0.94
	Relative intake of sugar	69501	105974	0.396074	0.084	1.26	0.05	0.29
ER neagtive	Relative intake of carbohydrates	21468	105974	0.168453	0.143	0.79	0.05	0.2
	Relative intake of fat	21468	105974	0.168453	0.128	1.4	0.05	0.44
	Relative intake of protein	21468	105974	0.168453	0.087	0.6	0.05	0.41
	Relative intake of sugar	21468	105974	0.168453	0.084	0.96	0.05	0.05
Note: R2 = Proportion of variance explained for the association between the SNP or allele score and the exposure variable; IVW = Inverse variance weighted

## Sheet: Table S3 
Supplementary Table S3. Sample overlap of exposure and outcome genome-wide association studies.
Sample of relative intake of macronutrients					Cohort information of breast cancer studies
					Zhang et al., 2020						Michailidou et al., 2017
Studies acronym	Full Name	Country	Sample size		Studies acronym	Studies Full Name	Country	Controls	Cases	overlap (n/%)	Studies acronym	Studies full name	Country	Controls	Cases	overlap (n/%)
EPIC-InterAct1	European Prospective Investigation into Cancer and Nutrition Study - InterAct1	UK, France, Germany, Italy, Spain, Sweden, the Netherlands	4818		EPIC	European Prospective Investigation Into Cancer and Nutrition	International (Europe)	3644	3847	7491/3.03%	EPIC	European Prospective Investigation Into Cancer and Nutrition	International (Europe)	3522	3535	7057/3.08%
EPIC-InterAct2	European Prospective Investigation into Cancer and Nutrition Study - InterAct2		7904		WHI	Women's Health Initiative	USA	4617	4936	8566/3.47%	WHI	Women's Health Initiative	USA	4613	4908	8566/3.74%
WHI-GARNET	Women's Health Initiative - Genomics and Randomized Trials Network	USA	2674		2SISTER	The Two Sister Study	USA	NA	1072	16057/6.50%	2SISTER	The Two Sister Study	USA	0	1068	15623/6.82%
WHI-HIPFX	Women's Health Initiative - Hip Fracture GWAS	USA	3739		ABCFS	Australian Breast Cancer Family Study	Australia	738	1439		ABCFS	Australian Breast Cancer Family Study	Australia	188	589
WHI-WHIMS+	Women's Health Initiative - Memory Study	USA	2153		ABCS	Amsterdam Breast Cancer Study	Netherlands	1817	1118		ABCS	Amsterdam Breast Cancer Study	Netherlands	4	143
ALSPAC-32wks	Avon Longitudinal Study of Parents and Children (32 weeks gestation)	England	1396		ABCS-F	Amsterdam Breast Cancer Study – Familial	Netherlands	NA	1108		ABCTB	Australian Breast Cancer Tissue Bank	Australia	374	848
ALSPAC-47wks	Avon Longitudinal Study of Parents and Children (47 weeks "gestation" i.e. postpartum)	England	5879		ABCTB	Australian Breast Cancer Tissue Bank	Australia	375	953		ACP	Asia Cancer Program	Thailand	0	0
DietGen	DietGen Consortium	USA	33531		AHS	Agricultural Health Study	USA	1137	514		BBCC	Bavarian Breast Cancer Cases and Controls	Germany	248	676
Fenland	Fenland Study	UK	7869		BBCC	Bavarian Breast Cancer Cases and Controls	Germany	706	857		BBCS	British Breast Cancer Study	UK	442	100
FHS	Framingham Heart Study	USA	6331		BBCS	British Breast Cancer Study	UK	3062	3243		BCEES	Breast Cancer Employment and Environment Study	Australia	834	782
HRS	Health and Retirement Study	USA	2628		BCEES	Breast Cancer Employment and Environment Study	Australia	835	783		BCFR-NY	New York Breast Cancer Family Registry	USA	27	454
LL	The Lifelines Cohort Study	Netherlands	6411		BCFR	Breast Cancer Family Registry	USA, Canada, Australia	2251	3129		BCFR-PA	Philadelphia Breast Cancer Family Registry	USA	0	137
RSI	Rotterdam Study I	Netherlands	4816		BCFR-NY	New York site of the Breast Cancer Family Registry	USA	27	454		BCFR-UT	Utah Breast Cancer Family Registry	USA	0	102
RSII	Rotterdam Study II	Netherlands	1311		BCFR-PA	Philadelphia site of the Breast Cancer Family Registry	USA	NA	139		BCINIS	Breast Cancer in Northern Israel Study	Israel	723	1437
RSIII	Rotterdam Study III	Netherlands	2209		BCFR-UTAH	Utah site of the Breast Cancer Family Registry	USA	NA	102		BREOGAN	Breast Oncology Galicia Network	Spain	725	1378
UKB	United Kingdom Biobank	UK	175253		BCINIS	Breast Cancer in Northern Israel Study	Israel	724	1437		BSUCH	Breast Cancer Study of the University of Heidelberg	Germany	167	265
					BIGGS	Breast Cancer in Galway Genetic Study	Ireland	719	836		CBCS	Canadian Breast Cancer Study	Canada	817	678
					BPC3	Breast and Prostate Cancer Cohort Consortium	International	2305	1998		CCGP	Crete Cancer Genetics Program	Greece	332	681
					BREOGAN	Breast Oncology Galicia Network	Spain	725	1377		CECILE	CECILE Breast Cancer Study	France	3	11
					BSUCH	Breast Cancer Study of the University of Heidelberg	Germany	1119	1048		CGPS	Copenhagen General Population Study	Denmark	712	1406
					CBCS	Canadian Breast Cancer Study	Canada	817	676		CPSII	Cancer Prevention Study-II Nutrition Cohort	USA	3025	3029
					CCGP	Crete Cancer Genetics Program	Greece	332	672		CTS	California Teachers Study	USA	577	1100
					CECILE	CECILE Breast Cancer Study	France	1002	1029		DIETCOMPLYF	DietCompLyf Breast Cancer Survival Study	UK	0	646
					CGPS	Copenhagen General Population Study	Denmark	5241	4358		ESTHER	ESTHER Breast Cancer Study	Germany	3	3
					CNIO-BCS	Spanish National Cancer Centre Breast Cancer Study	Spain	871	899		GC-HBOC	German Consortium for Hereditary Breast & Ovarian Cancer	Germany	1593	3365
					CPSII	Cancer Prevention Study-II Nutrition Cohort	USA	3322	3238		GENICA	Gene Environment Interaction and Breast Cancer in Germany	Germany	284	459
					CTS	California Teachers Study	USA	647	1175		GeparSixto	Randomized phase II trial investigating the addition of carboplatin to neoadjuvant therapy for triple-negative and HER2-positive early breast cancer	Germany	0	385
					DIETCOMPLYF	DietCompLyf Breast Cancer Survival Study	UK	0	711		GESBC	Genetic Epidemiology Study of Breast Cancer by Age 50	Germany	180	357
					ESTHER	ESTHER Breast Cancer Study	Germany	505	481		HABCS	Hannover Breast Cancer Study	Germany	865	916
					FHRISK	Family History Risk Study	UK	296	146		HCSC	Hospital Clinico San Carlos	Spain	0	426
					GC-HBOC	German Consortium for Hereditary Breast & Ovarian Cancer	Germany	2209	4268		HEBCS	Helsinki Breast Cancer Study	Finland	2	53
					GENICA	Gene Environment Interaction and Breast Cancer in Germany	Germany	710	922		HERPACC	Hospital-based Epidemiologic Research Program at Aichi Cancer Center	Japan	0	0
					GEPARSIXTO	Randomized phase II trial	Germany	NA	387		HKBCS	Hong Kong Breast Cancer Study	China	0	0
					GESBC	Genetic Epidemiology Study of Breast Cancer by Age 50	Germany	181	358		HMBCS	Hannover-Minsk Breast Cancer Study	Belarus	214	70
					HABCS	Hannover Breast Cancer Study	Germany	866	928		HUBCS	Hannover-Ufa Breast Cancer Study	Russia	131	221
					HCSC	Hospital Clinico San Carlos	Spain	NA	426		KARBAC	Karolinska Breast Cancer Study	Sweden	0	77
					HEBCS	Helsinki Breast Cancer Study	Finland	2248	2669		KARMA	Karolinska Mammography Project for Risk Prediction of Breast Cancer	Sweden	6042	2205
					HMBCS	Hannover-Minsk Breast Cancer Study	Belarus	344	746		KBCP	Kuopio Breast Cancer Project	Finland	182	136
					HUBCS	Hannover-Ufa Breast Cancer Study	Russia	120	211		KOHBRA	Korean Hereditary Breast Cancer Study	Korea	0	0
					KARBAC	Karolinska Breast Cancer Study	Sweden	658	810		LMBC	Leuven Multidisciplinary Breast Centre	Belgium	435	805
					KARMA	Karolinska Mammography Project for Risk Prediction of Breast Cancer – Cohort Study	Sweden	6026	2645		MABCS	Macedonian Breast Cancer Study	Macedonia	93	90
					KBCP	Kuopio Breast Cancer Project	Finland	433	581		MARIE	Mammary Carcinoma Risk Factor Investigation	Germany	288	57
					KCONFAB/AOCS	Kathleen Cuningham Foundation Consortium for research into Familial Breast Cancer/Australian Ovarian Cancer Study	Australia and New Zeland	896	556		MBCSG	Milan Breast Cancer Study Group	Italy	366	788
					LMBC	Leuven Multidisciplinary Breast Centre	Belgium	1268	805		MCBCS	Mayo Clinic Breast Cancer Study	USA	179	651
					MABCS	Macedonian Breast Cancer Study	Macedonia	92	90		MCCS	Melbourne Collaborative Cohort Study	Australia	712	615
					MARIE	Mammary Carcinoma Risk Factor Investigation	Germany	2535	2455		MEC	Multi-ethnic Cohort	USA	127	70
					MBCSG	Milan Breast Cancer Study Group	Italy	766	1276		MISS	Melanoma Inquiry of Southern Sweden	Sweden	1523	692
					MCBCS	Mayo Clinic Breast Cancer Study	USA	2050	2502		MMHS	Mayo Mammography Health Study	USA	1605	375
					MCCS	Melbourne Collaborative Cohort Study	Australia	1206	1247		MTLGEBCS	Montreal Gene-Environment Breast Cancer Study	Canada	29	44
					MEC	Multiethnic Cohort	USA	853	803		MYBRCA	Malaysian Breast Cancer Genetic Study	Malaysia	0	0
					MISS	Melanoma Inquiry of Southern Sweden	Sweden	1545	701		NBCS	Norwegian Breast Cancer Study	Norway	0	1283
					MMHS	Mayo Mammography Health Study	USA	1635	384		NBHS	Nashville Breast Health Study	USA	613	641
					MSKCC	Memorial Sloan-Kettering Cancer Center Study	USA	NA	138		NGOBCS	Nagano Breast Cancer Study	Japan	0	0
					MTLGEBCS	Montreal Gene-Environment Breast Cancer Study	Canada	465	533		NC-BCFR	Northern California Breast Cancer Family Registry	USA	149	776
					NBCS	Norwegian Breast Cancer Study	Norway	277	1373		NHS	Nurses Health Study	USA	1804	1588
					NBHS	Nashville Breast Health Study	USA	731	766		NHS2	Nurses Health Study 2	USA	1905	1606
					NC-BCFR	Northern California Breast Cancer Family Registry	USA	151	774		OFBCR	Ontario Familial Breast Cancer Registry	Canada	217	993
					NCBCS	North Carolina Breast Cancer study	USA	1006	2389		ORIGO	Leiden University Medical Centre Breast Cancer Study	Netherlands	660	1015
					NHS	Nurses Health Study	USA	1804	1590		PBCS	NCI Polish Breast Cancer Study	Poland	1658	1439
					NHS2	Nurses Health Study 2	USA	1905	1607		PLCO	The Prostate, Lung, Colorectal and Ovarian (PLCO) Cancer Screening Trial	USA	858	865
					OBCS	Oulu Breast Cancer Study	Finland	414	507		POSH	Prospective Study of Outcomes in Sporadic Versus Hereditary Breast Cancer	UK	0	1019
					OFBCR	Ontario Familial Breast Cancer Registry	Canada	728	2168		PreFace	Evaluation of Predictive Factors regarding the Effectivity of Aromatase Inhibitor Therapy	Germany	0	968
					ORIGO	Leiden University Medical Centre Breast Cancer Study	Netherlands	986	1404		RBCS	Rotterdam Breast Cancer Study	Netherlads	231	451
					PBCS	NCI Polish Breast Cancer Study	Poland	2082	1958		SBCGS	Shanghai Breast Cancer Genetic Study	China	0	0
					PKARMA	Karolinska Mammography Project for Risk Prediction of Breast Cancer - Case-Control Study	Sweden	5454	5517		SEARCH	Study of Epidemiology and Risk factors in Cancer Heredity	UK	989	3999
					PLCO	The Prostate, Lung, Colorectal and Ovarian (PLCO) Cancer Screening Trial	USA	2595	2305		SEBCS	Seoul Breast Cancer Study	Korea	0	0
					POSH	Prospective Study of Outcomes in Sporadic Versus Hereditary Breast Cancer	UK	NA	1088		SGBCC	Singapore Breast Cancer Cohort	Singapore	0	0
					PREFACE	Evaluation of Predictive Factors regarding the Effectivity of Aromatase Inhibitor Therapy	Germany	NA	2989		SISTER	The Sister Study	USA	1560	2014
					PROCAS	Predicting the Risk Of Cancer At Screening Study	UK	1656	647		SKKDKFZS	Städtisches Klinikum Karlsruhe Deutsches Krebsforschungszentrum Study	Germany	0	1017
					RBCS	Rotterdam Breast Cancer Study	Netherlands	928	1106		SMC	Swedish Mammography Cohort	Sweden	708	1478
					SASBAC	Singapore and Sweden Breast Cancer Study	Sweden	2129	1919		SuccessB	Simultaneous Study of Gemcitabine-Docetaxel Combination adjuvant treatment	Germany	0	439
					SBCS	Sheffield Breast Cancer Study	UK	848	843		SuccessC	Simultaneous Study of Docetaxel Based Anthracycline Free Adjuvant Treatment Evaluation	Germany	0	1335
					SEARCH	Study of Epidemiology and Risk factors in Cancer Heredity	UK	8909	13049		SZBCS	IHCC-Szczecin Breast Cancer Study	Poland	157	387
					SISTER	The Sister Study	USA	1562	2011		TNBCC	Triple-negative Breast Cancer Consortium	USA/Germany	0	759
					SKKDKFZS	Städtisches Klinikum Karlsruhe Deutsches Krebsforschungszentrum Study	Germany	29	1231		TWBCS	Taiwanese Breast Cancer Study	Taiwan	0	0
					SMC	Swedish Mammography Cohort	Sweden	704	1509		UCIBCS	UCI Breast Cancer Study	USA	258	501
					SUCCESSB	Simultaneous Study of Gemcitabine-Docetaxel Combination adjuvant treatment	Germany	NA	440		UKBGS	UK Breakthrough Generations Study	UK	567	1159
					SUCCESSC	Simultaneous Study of Docetaxel Based Anthracycline Free Adjuvant Treatment Evaluation	Germany	NA	2836		UK Ovarian Cancer Population Study	(http://www.instituteforwomenshealth.ucl.ac.uk/womens-cancer/gcrc/ukops)	UK	974	0
					SZBCS	IHCC-Szczecin Breast Cancer Study	Poland	472	752		UKBGS	UK Breakthrough Generations Study	UK	1037	160
					TNBCC	Triple-Negative Breast Cancer Consortium	International	3313	2182		UKOPS	UK Ovarian Cancer Population Study	UK	974	100
					UCIBCS	UCI Breast Cancer Study	USA	258	501
					UK2	UK2 GWAS	UK	2663	3628
					UKBGS	UK Breakthrough Generations Study	UK	1032	1642
					UKOPS	UK Ovarian Cancer Population Study	UK	974	NA
					USRT	US Radiologic Technologists Study	USA	1699	1692
					VUMC			3255	464
Note：The yellow zone represents overlapped studies. The red zone shows the overlapped sample size and rate.

## Sheet: Table S4 
Supplementary Table S4: Details for Mendelian randomization studies with tightened instrument variables selection.
Exposure	Outcome	MR-EGGER								Weighted Median				IVW
		nsnp	beta	se	pval	Q	Q_pval	egger_intercept	egger_intercept_test pval	wm.nsnp	wm.beta	wm.se	wm.pval	ivw.nsnp	ivw.beta	ivw.se	ivw.pval	ivw.Q	ivw.Q_pval
Relative intake of protein (P < 5E-8)	Her2 postive breast cancer (BCAC), Zhang et al., 2020	7	0.945316	2.27876	0.695459	6.67126	0.246259	-0.0492667	0.382191	7	-0.669011	0.624546	0.284081	7	-1.17294	0.544605	0.0313	7.89506	0.245893
Relative intake of protein (P < 5E-9)	Her2 postive breast cancer (BCAC), Zhang et al., 2020	6	1.09662	2.59455	0.694273	6.5628	0.160876	-0.0541158	0.418671	6	-0.507472	0.635921	0.424864	6	-1.16724	0.63149	0.0645463	7.89386	0.162183

## Sheet: Table S5
Supplementary Table S5. Results of MR analysis and sensitivity analysis.
Exposure	Outcome	Method	Number of IVs	P	OR	Lower 95% confidence interval	Upper 95% confidence interval	Cochran’s Q test			MR-Egger_intercept test			First MR-presso			Second MR-presso
								Method	Q	Q_pval	Egger_intercept	SE	P	MR-PRESSO global_test_RSSobs	MR-PRESSO global_test_Pvalue	Outliers	MR-PRESSO global_test_RSSobs	MR-PRESSO global_test_Pvalue
Carbohydrate	Overall	IVW	6	0.190547	1.26	0.89	1.8	IVW	7.89182	0.1623	-0.0193534	0.0212457	0.41386	166.451	<1e-04	rs2472297	10.8125	0.2138
		Weighted median	6	0.0936639	1.39	0.946	2.05									rs36123991
		MR Egger	6	0.333943	3.68	0.359	37.77									rs7190396
	Luminal A	IVW	5	0.0178853	1.61	1.09	2.4	IVW	3.76861	0.438225	0.00861748	0.0255043	0.757713	124.739	<1e-04	rs2472297	6.1564	0.4857
		Weighted median	5	0.25392	1.35	0.8065	2.26									rs36123991
		MR Egger	5	0.993755	1.01	0.0653	15.67									rs7190396
																rs10206338
	Luminal B	IVW	7	0.143314	2.07	0.781	5.5	IVW	9.5852	0.143242	-0.137156	0.0485386	0.03686	40.4084	0.0006	rs36123991	15.0169	0.1429
		Weighted median	7	0.271603	1.84	0.621	5.45									rs7190396
		MR Egger	7	0.0279567	4060.4	19.982	825000
	Luminal B Her2-	IVW	8	0.869611	0.946	0.49	1.83	IVW	7.9072	0.340848	0.0215821	0.044404	0.644179	26.0012	0.0119	rs7190396	10.0209	0.3701
		Weighted median	8	0.657118	0.828	0.36	1.9
		MR Egger	8	0.632622	0.293	0.00245	35.01
	Her2+	IVW	8	0.894457	1.1	0.266	4.55	IVW	13.2048	0.0672725	-0.0124893	0.105269	0.909431	34.575	0.001	rs10433500	17.2619	0.0826
		Weighted median	8	0.247193	2.45	0.537	11.2
		MR Egger	8	0.89752	2.15	2.97e-05	156000
	Triple-negative	IVW	8	0.607641	0.83	0.407787	1.69	IVW	9.00433	0.252345	0.0332499	0.0469798	0.50565	50.5871	<1e-04	rs7190396	11.7374	0.2752
		Weighted median	8	0.27056	0.625	0.2708	1.44
		MR Egger	8	0.469247	0.136	0.000864	21.46
	ER-	IVW	6	0.384093	0.79	0.46	1.34	IVW	2.48412	0.778885	-0.027551	0.0331383	0.452501	79.161	<1e-04	rs10433500	3.70254	0.7799
		Weighted median	6	0.934293	1.03	0.52	2.03									rs36123991
		MR Egger	6	0.526669	3.53	0.1	125.14									rs7190396
																rs8097672
	ER+	IVW	7	0.846429	1.04	0.72	1.51	IVW	7.74002	0.257776	-0.0248275	0.0229101	0.327969	107.118	<1e-04	rs36123991	10.6488	0.2822
		Weighted median	7	0.537536	1.36	0.88	2.11									rs7190396
		MR Egger	7	0.369485	4.11	0.33	50.62									rs8097672
Fat	Overall	IVW	4	0.681735	0.908	0.572	1.44	IVW	12.3503	0.00627472	-0.0189478	0.00776271	0.134739	26.4422	0.1336	NA	NA	NA
		Weighted median	4	0.854361	0.971	0.705	1.34
		MR Egger	4	0.243921	1.518	0.92	2.51
	Luminal A	IVW	4	0.539595	0.857	0.524	1.4	IVW	8.24335	0.0412412	-0.0196716	0.00892035	0.158224	14.2216	0.1653	NA	NA	NA
		Weighted median	4	0.822121	0.962	0.683	1.35
		MR Egger	4	0.327992	1.453	0.821	2.57
	Luminal B	IVW	4	0.828099	1.17	0.285	4.8	IVW	15.196	0.00165658	-0.0362732	0.0406779	0.466636	41.4338	0.1494	NA	NA	NA
		Weighted median	4	0.0506111	2.51	0.998	6.3
		MR Egger	4	0.487064	2.93	0.242	35.5
	Luminal B Her2-	IVW	4	0.522771	0.73894	0.292176	1.86885	IVW	8.6285	0.0346605	-0.0385034	0.0154522	0.130309	15.8186	0.1481	NA	NA	NA
		Weighted median	4	0.876783	1.05044	0.5639	1.95678
		MR Egger	4	0.291346	2.01872	0.765791	5.3216
	Her2+	IVW	4	0.161474	0.51496	0.203373	1.30393	IVW	0.386223	0.943074	0.00901643	0.025576	0.758122	0.671566	0.9436	NA	NA	NA
		Weighted median	4	0.186023	0.492352	0.172264	1.40721
		MR Egger	4	0.387651	0.406395	0.0811383	2.0355
	Triple-negative	IVW	4	0.148224	1.4961	0.866524	2.58309	IVW	0.590909	0.89851	0.000330929	0.0151225	0.984528	1.06083	0.9018	NA	NA	NA
		Weighted median	4	0.272258	1.43207	0.754272	2.71893
		MR Egger	4	0.495491	1.48347	0.582147	3.78028
	ER-	IVW	4	0.117447	1.4	0.92	2.12	IVW	0.987199	0.804349	-0.000818439	0.0115437	0.949929	1.91629	0.8014	NA	NA	NA
		Weighted median	4	0.100517	1.49	0.93	2.41
		MR Egger	4	0.438736	1.43	0.69	2.96
	ER+	IVW	4	0.672711	0.89	0.5	1.57	IVW	13.0581	0.00451256	-0.0204494	0.0130341	0.25722	24.1142	0.1092	NA	NA	NA
		Weighted median	4	0.397076	1.17	0.82	1.66
		MR Egger	4	0.424887	1.53	0.66	3.5
Protein	Overall	IVW	4	0.00845827	0.64	0.45	0.89	IVW	2.76339	0.429562	0.0168229	0.0168398	0.423037	110.578	<1e-04	rs13146907	4.96923	0.4933
		Weighted median	4	0.0322224	0.65	0.44	0.96									rs55872725
		MR Egger	4	0.26599	0.285773	0.0573408	1.42422									rs838133
	Luminal A	IVW	4	0.00220857	0.5	0.32	0.78	IVW	0.0180827	0.999357	0.00126819	0.0223259	0.959866	76.1956	<1e-04	rs13146907	0.0319025	0.9996
		Weighted median	4	0.0094441	0.5	0.29	0.84									rs55872725
		MR Egger	4	0.560252	0.472413	0.0565549	3.94614									rs838133
	Luminal B	IVW	5	0.0936111	0.482683	0.205998	1.13099	IVW	5.27203	0.260507	0.0568394	0.0341233	0.194361	41.5895	0.001	rs13146907	11.8169	0.2736
		Weighted median	5	0.442172	0.667403	0.23797	1.87178									rs55872725
		MR Egger	5	0.124946	0.0478725	0.00285798	0.801888
	Luminal B Her2-	IVW	6	0.993988	1.00223	0.561292	1.78956	IVW	3.94346	0.557585	0.0328007	0.0287591	0.317717	19.0303	0.0457	rs55872725	5.1821	0.6197
		Weighted median	6	0.992077	1.00363	0.49073	2.05261
		MR Egger	6	0.331126	0.257762	0.0232771	2.85436
	Her2+	IVW	6	0.0645463	0.311225	0.0902692	1.07303	IVW	7.89386	0.162183	-0.0541158	0.0600814	0.418671	10.9019	0.2837	NA	NA	NA
		Weighted median	6	0.424864	0.602015	0.173102	2.0937
		MR Egger	6	0.694273	2.99402	0.0185238	483.925
	Triple-negative	IVW	5	0.874447	0.942921	0.454845	1.95473	IVW	1.70741	0.789371	0.00303022	0.0424254	0.947555	49.9216	0.0004	rs55872725	2.68221	0.7915
		Weighted median	5	0.646547	0.810787	0.330792	1.98728									rs838133
		MR Egger	5	0.927217	0.817925	0.0154371	43.3374
	ER-	IVW	5	0.0678625	0.6	0.35	1.04	IVW	2.18323	0.7021	0.0282277	0.0317492	0.439452	54.8903	0.0001	rs55872725	3.52093	0.7045
		Weighted median	5	0.362459	0.73	0.37	1.43									rs838133
		MR Egger	5	0.313377	0.16	0.16	3.12
	ER+	IVW	4	0.000790739	0.49	0.32	0.74	IVW	2.15954	0.539961	0.026307	0.0209054	0.335252	78.0861	<1e-04	rs13146907	4.04002	0.5896
		Weighted median	4	0.0143977	0.52	0.3	0.88									rs55872725
		MR Egger	4	0.192964	0.14	0.02	1.03									rs838133
Sugar	Overall	IVW	3	0.266678	1.36262	0.789334	2.35226	IVW	3.58015	0.166948	-0.326311	0.173002	0.31035	96.4387	<1e-04	rs838144	NA	NA
		Weighted median	3	0.770546	1.08265	0.634913	1.84614									rs9972653
		MR Egger	3	0.30567	3.03376e+07	0.699339	1316054936074520
	Luminal A	IVW	3	0.37573	1.27527	0.74462	2.18409	IVW	1.32042	0.516743	-0.197575	0.228044	0.545497	68.4728	0.0001	rs838144	NA	NA
		Weighted median	3	0.395962	1.33291	0.686493	2.58801									rs9972653
		MR Egger	3	0.538179	35840.2	3.07151e-06	418205143672880
	Luminal B	IVW	4	0.00138805	8.72	2.31	32.88	IVW	7.45879	0.0586268	0.000575899	0.109366	0.996277	21.7634	0.0248	rs7012814	11.4998	0.1882
		Weighted median	4	0.000143314	9.21	2.93	28.91
		MR Egger	4	0.703598	8.49943	0.000601158	120168
	Luminal B Her2-	IVW	5	0.152721	2.4085	0.721952	8.03499	IVW	13.4118	0.00942955	0.104574	0.0708175	0.236261	24.1189	0.0503	NA	NA	NA
		Weighted median	5	0.938862	1.03818	0.398524	2.70452
		MR Egger	5	0.320871	0.0209753	3.53994e-05	12.4285
	Her2+	IVW	5	0.00919239	4.4	1.44	13.43	IVW	2.73787	0.602605	0.0486036	0.0744005	0.560184	4.54626	0.6211	NA	NA	NA
		Weighted median	5	0.19453	2.57354	0.617	10.7344
		MR Egger	5	0.846556	0.486252	0.00059594	396.753
	Triple-negative	IVW	3	0.943224	1.03796	0.372239	2.8943	IVW	0.104599	0.949045	0.114199	0.436419	0.837067	53.4704	0.0015	rs838144	NA	NA
		Weighted median	3	0.964096	1.02719	0.319387	3.30359									rs9972653
		MR Egger	3	0.83809	0.00278116	1.49436e-22	5.17603e+16
	ER-	IVW	4	0.898388	0.96	0.55	1.68	IVW	1.314	0.725812	-0.0201414	0.0350356	0.623421	55.2189	0.0004	rs9972653	2.28516	0.7579
		Weighted median	4	0.774844	1.1	0.58	2.07
		MR Egger	4	0.641938	2.35	0.11	51.1
	ER+	IVW	4	0.213304	1.26	0.88	1.82	IVW	1.43081	0.698328	-0.0147897	0.0229403	0.585197	63.9718	0.0005	rs9972653	2.46941	0.7316
		Weighted median	4	0.272172	1.28	0.82	2.01
		MR Egger	4	0.480722	2.42	0.32	18.14
